# Supplementary material
Source: PubMed Central journal article supplement (PMC8495663)
Supplement: NIHMS1684445-supplement-1.pdf [file NIHMS1684445-supplement-1.pdf]

## Supplemental Figure 1

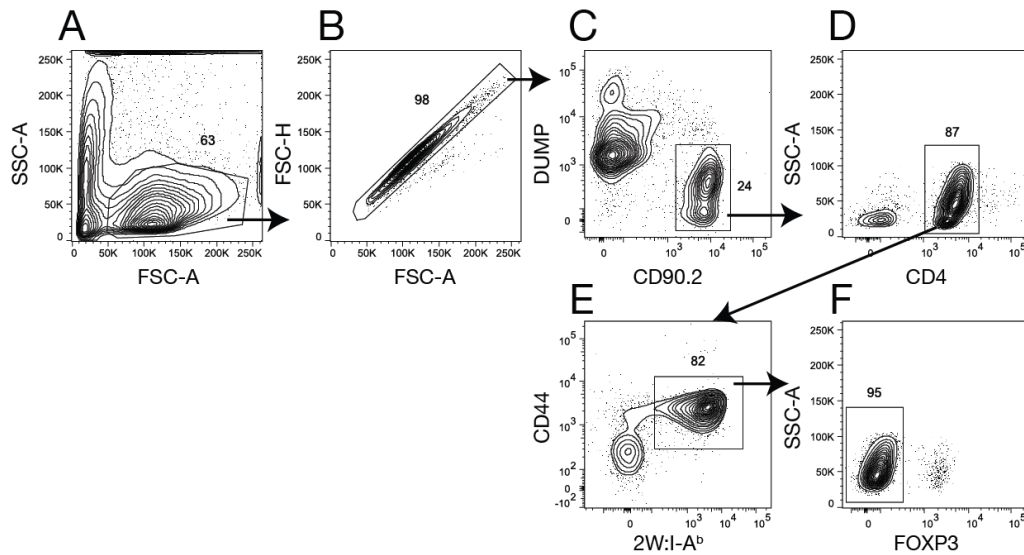

**Figure S1 related to Figure 1. Flow cytometry gating strategy for identification of tetramer-binding conventional CD4<sup>+</sup> T cells.** The figure shows a gating sequence for a spleen and lymph node sample from an IAV-2W-infected B6 mouse after 2W:I-A<sup>b</sup>/SA-APC tetramer staining, magnetic enrichment, and staining with fluorophore-conjugated antibodies. The sequence was designed to include cells with light scatter properties of lymphocytes (A), that were singlets (B), non-T lineage-negative CD90<sup>+</sup> (C), CD4<sup>+</sup> (D), tetramer<sup>+</sup> (E), and FOXP3<sup>-</sup> (F).

## Supplemental Figure 2

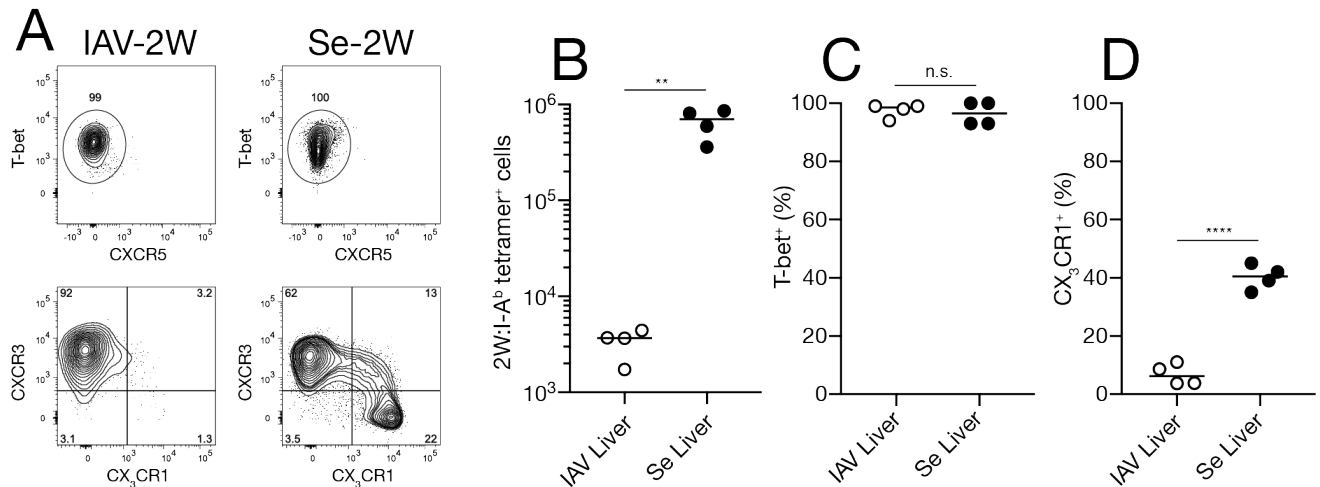

**Figure S2 related to Figure 1. Expansion and differentiation of 2W:I-A<sup>b</sup>-specific T cells from the liver.** (A) Flow cytometry plots of 2W:I-A<sup>b</sup> tetramer-binding cells from livers of day 10 IAV-2W or Se-2W-infected mice. (B) Number of 2W:I-A<sup>b</sup> tetramer-binding cells from individual mice ( $n \geq$  four from two independent experiments) from the livers of day 10 IAV-2W or Se-2W-infected mice. (C, D) Percent T-bet<sup>+</sup> among 2W:I-A<sup>b</sup> tetramer-binding cells (C) or percent CX<sub>3</sub>CR1<sup>+</sup> cells among T-bet<sup>+</sup> 2W:I-A<sup>b</sup> tetramer-binding cells (D) from the livers of individual mice ( $n \geq$  four from two independent experiments). Values in B-D were compared using an unpaired Student's t-test (\*\* $p < 0.01$ , \*\*\* $p < 0.001$ ). Mean values on scatter plots are indicated with a horizontal bar.
